# Supplementary material
Source: PubMed Central journal article supplement (PMC3911242)
Supplement: JB.01080-13_zjb999092992so1.pdf [file JB.01080-13_zjb999092992so1.pdf]

**Table S1** Primers used in this study

| Primer                                                      | Primer sequence (5' to 3')         | Restriction site <sup>a</sup> |
|-------------------------------------------------------------|------------------------------------|-------------------------------|
| <b>Primers used to identify <i>Xanthomonas</i> isolates</b> |                                    |                               |
| Xan16-23-F1                                                 | AAGGAGGTGATCCAGCCGCA               |                               |
| Xan16-23-F2                                                 | CTGAGCCAGGATCAAACCTCTTC            |                               |
| Xan16-23-R                                                  | CCTGACCTATCAACCACGTAGT             |                               |
| <b>Primers used to construct pSJA101</b>                    |                                    |                               |
| Xf-DS- <i>pilA</i> -F                                       | ATAACACCCGGGTGAATACACACAGCAACACG   | XmaI                          |
| Xf-DS- <i>pilA</i> -R                                       | GTAATATCTAGAGCGCAGGGAAACGATGGAAGGT | XbaI                          |
| <b>Primers used to construct pSJA102</b>                    |                                    |                               |
| Km <sup>r</sup> -F                                          | GCGGCGGGTACCTCGATGAATTGTGTCTCAAAA  | KpnI                          |
| Km <sup>r</sup> -R                                          | AGCAGCCCCGGGTTAGAAAACTCATCGAGCAT   | XmaI                          |
| <b>Primers used to construct pSJA103</b>                    |                                    |                               |
| Xf-US- <i>pilA</i> -F                                       | ATAATAGAGCTCGAGAGCAACCGCGACAATAGCA | SacI                          |
| Xf-US- <i>pilA</i> -R                                       | GCGGCGGGTACCGTGTATACCTTCAATAAAAAG  | KpnI                          |
| <b>Primers used to construct pSJA104</b>                    |                                    |                               |
| Xf- <i>pilA</i> -F                                          | GCGGCGTCTAGATTCTGGAAGAATGGATCG     | XbaI                          |
| Xf- <i>pilA</i> -R                                          | AGGTGTCTCGAGTTATTTAGCGGCAGTGCA     | XhoI                          |
| <b>Primers used to construct pSJA105</b>                    |                                    |                               |
| Xan-US- <i>pilA</i> -F                                      | GCGGCGGCTAGCTTTGAAGACATCTTCGAATTG  | NheI                          |
| Xan-US- <i>pilA</i> -R                                      | ATGGCCAGATCTAATGTACCCCTAGAGATGGTGT | BglII                         |
| <b>Primers used to construct pSJA106</b>                    |                                    |                               |
| Xan-DS- <i>pilA</i> -F                                      | GCGCGCAGATCTGATTCGGTTGGATGGTTTTGAT | BglII                         |

Xan-DS-*pilA*-F      ATAAATAAAGCTTTTGACCGGCGCCTTGGCCACGC      HindIII

**Primers used to construct pSJA107**

Xan-*pilA*-F      GCGGCGGCTAGCCTTATCCGTCAACACCAT      NheI

Xan-*pilA*-R      GTGAATAAAGCTTTTACTGACAGGTCGCCGGGGC      HindIII

**Primers used to detect prophage**

Sano-primase-F      AACCTGATCTGGTACGAC

Sano-primase-R      GGACATTTTTTCAGTTCTCTC

Salvo-primase-F      CAACCTCATCTGGTATGAC

Salvo-primase-F      GTCTTGGGTAATTTCTTTCT

Prado-helicase-F      AACTACCTGACAGCGACT

Prado-helicase-R      CGTACTAGCTTGGCTTCTA

Paz-helicase-F      AAGAAGCGTGGTTTGTTC

Paz-helicase-R      CTACCGGCTTCCCTAACTCC

---

<sup>a</sup> Restriction sites introduced in the primers are underlined.

**TABLE S2** Comparative annotations of phages Sano and Salvo<sup>a</sup>

| Gene(s) |          | % protein identity <sup>b</sup> | Strand <sup>c</sup> | Size (kDa) | Putative function    | BcepNazgul homolog locus tag <sup>d</sup> | Evidence <sup>e</sup> |
|---------|----------|---------------------------------|---------------------|------------|----------------------|-------------------------------------------|-----------------------|
| Sano_01 | Salvo_01 | 52.2                            | R                   | 10.2, 9.9  | hypothetical protein |                                           |                       |
| Sano_02 | Salvo_02 |                                 | R                   | 7.1, 17.5  | hypothetical protein |                                           |                       |
| Sano_03 | Salvo_03 |                                 | R                   | 7.2, 36.8  | hypothetical protein |                                           |                       |
| Sano_04 | Salvo_04 |                                 | R                   | 13.1, 18.6 | hypothetical protein |                                           |                       |
| Sano_05 | Salvo_05 |                                 | R                   | 5.0, 15.8  | hypothetical protein |                                           |                       |
| Sano_06 |          |                                 | R                   | 7.3        | hypothetical protein |                                           |                       |
| Sano_07 |          |                                 | R                   | 6.8        | hypothetical protein |                                           |                       |
| Sano_08 |          |                                 | R                   | 20.3       | conserved protein    |                                           |                       |
| Sano_09 | Salvo_06 | 50.1                            | R                   | 27.9, 22.2 | conserved protein    |                                           |                       |
|         | Salvo_07 |                                 | R                   | 5.4        | hypothetical protein |                                           |                       |
| Sano_10 |          |                                 | R                   | 5.3        | hypothetical protein |                                           |                       |
| Sano_11 | Salvo_08 | 21.4                            | R                   | 7.3, 6.8   | hypothetical protein |                                           |                       |

|                |                 |      |   |            |                      |
|----------------|-----------------|------|---|------------|----------------------|
|                | <i>Salvo_09</i> |      | F | 5.2        | hypothetical protein |
|                | <i>Salvo_10</i> |      | F | 3.9        | hypothetical protein |
| <i>Sano_12</i> |                 |      | R | 19.6       | hypothetical protein |
| <i>Sano_13</i> | <i>Salvo_11</i> | 57.1 | F | 14.7, 15.1 | hypothetical protein |
| <i>Sano_14</i> | <i>Salvo_12</i> | 46.0 | F | 19.1, 20.0 | hypothetical protein |
| <i>Sano_15</i> | <i>Salvo_13</i> | 31.0 | F | 66.8, 61.9 | hypothetical protein |
|                | <i>Salvo_14</i> |      | F | 9.5        | hypothetical protein |
| <i>Sano_16</i> | <i>Salvo_15</i> | 66.2 | F | 8.7, 9.2   | hypothetical protein |
| <i>Sano_17</i> | <i>Salvo_16</i> | 36.5 | F | 17.9, 19.2 | hypothetical protein |
| <i>Sano_18</i> | <i>Salvo_17</i> | 89.1 | F | 11.9, 12.0 | conserved protein    |
| <i>Sano_19</i> | <i>Salvo_18</i> | 79.8 | F | 10.8, 10.8 | hypothetical protein |
| <i>Sano_20</i> |                 |      | F | 19.6       | hypothetical protein |
| <i>Sano_21</i> |                 |      | F | 6.5        | hypothetical protein |
| <i>Sano_22</i> | <i>Salvo_19</i> | 93.6 | F | 11.6, 11.7 | hypothetical protein |
| <i>Sano_23</i> | <i>Salvo_20</i> | 67.8 | F | 22.0, 22.2 | hypothetical protein |
| <i>Sano_24</i> |                 |      | F | 5.9        | hypothetical protein |

|         |          |      |   |            |                      |                                          |
|---------|----------|------|---|------------|----------------------|------------------------------------------|
| Sano_25 | Salvo_21 | 56.5 | F | 11.8, 11.8 | hypothetical protein |                                          |
| Sano_26 | Salvo_22 | 76.6 | F | 8.2, 7.8   | hypothetical protein |                                          |
| Sano_27 | Salvo_23 | 34.1 | F | 12.4, 15.2 | hypothetical protein |                                          |
| Sano_28 | Salvo_24 | 68.4 | F | 26.3, 26.6 | conserved protein    | NP_918968.1(E=1.24E-09, Dice=19.3)       |
| Sano_29 | Salvo_25 | 52.1 | F | 16.0, 14.8 | hypothetical protein |                                          |
| Sano_30 | Salvo_26 | 49.4 | F | 19.5, 18.0 | hypothetical protein |                                          |
| Sano_31 | Salvo_27 | 57.6 | F | 24.8, 25.5 | hypothetical protein |                                          |
| Sano_32 | Salvo_28 | 12.8 | F | 10.2, 10.3 | hypothetical protein |                                          |
| Sano_33 | Salvo_29 | 62.5 | F | 21.9, 22.1 | hypothetical protein |                                          |
| Sano_34 | Salvo_30 | 76.9 | F | 17.0, 17.0 | conserved protein    | IPR012816, PF08719, TIGR02464, SSF143990 |
|         | Salvo_31 |      | F | 12.7       | hypothetical protein |                                          |
| Sano_35 | Salvo_32 | 53.1 | F | 27.1, 27.7 | conserved protein    | SSF52374, SSF52540, (PF13207, Sano only) |

|         |          |      |   |            |                      |                                                                                                                                                                  |
|---------|----------|------|---|------------|----------------------|------------------------------------------------------------------------------------------------------------------------------------------------------------------|
|         |          |      |   |            |                      | (IPR002891, PF01583<br>Salvo only)                                                                                                                               |
| Sano_36 |          |      | F | 11.4       | hypothetical protein |                                                                                                                                                                  |
| Sano_37 | Salvo_33 | 75.9 | F | 34.1, 34.2 | conserved protein    | (IPR002815, SSF56726,<br>Salvo only)                                                                                                                             |
| Sano_38 |          |      | F | 9.7        | hypothetical protein |                                                                                                                                                                  |
| Sano_39 | Salvo_34 | 30.1 | R | 11.2, 13.5 | o-spanin             | (Lipoprotein adjacent to<br>inner membrane spanin<br>component, Sano only)<br>(lipoprotein overlapped<br>with inner membrane<br>spanin component, Salvo<br>only) |
| Sano_40 | Salvo_35 | 31.7 | R | 13.6, 15.4 | i-spanin             | N-terminal TMD                                                                                                                                                   |
| Sano_41 | Salvo_37 |      | R | 17.7, 16.3 | holin-antiholin      | (Predicted 1 TMD, Sano<br>only) (predicted 2 TMDs,                                                                                                               |

|         |          |      |   |            |                    |                                                                                                                                         |
|---------|----------|------|---|------------|--------------------|-----------------------------------------------------------------------------------------------------------------------------------------|
| Sano_42 | Salvo_38 |      | R | 15.8, 28.6 | holin-antiholin    | Salvo only)<br>(Predicted 4 TMDs, Sano only) (Predicted 1 TMD, Salvo only)                                                              |
| Sano_43 | Salvo_36 |      | R | 21.3, 31.5 | endolysin          | (IPR024408, PF11860, HHpred hit 3gxr_A prob 97.7% E=4E-05, Sano only) (LipoP, SignalP, HHpred hit 2anv_A prob 100% E=3E-37, Salvo only) |
| Sano_44 | Salvo_39 | 46.0 | R | 37.4, 38.5 | tail fiber protein | (IPR001791, SM00282, Sano only) IPR008985, SSF49899, PF13385, Positional evidence, see text                                             |

---

|         |          |      |   |            |                                    |                                           |                                                                                |
|---------|----------|------|---|------------|------------------------------------|-------------------------------------------|--------------------------------------------------------------------------------|
| Sano_45 | Salvo_40 | 72.8 | R | 34.8, 35.2 | conserved tail<br>assembly protein |                                           | Positional evidence, see<br>text                                               |
| Sano_46 | Salvo_41 | 85.7 | R | 6.3, 6.3   | conserved tail<br>assembly protein |                                           | Positional evidence, see<br>text                                               |
| Sano_47 | Salvo_42 | 83.9 | R | 27.2, 27.0 | conserved tail<br>assembly protein |                                           | Positional evidence, see<br>text                                               |
| Sano_48 | Salvo_43 | 75.2 | R | 90.7, 89.5 | conserved tail<br>assembly protein | NP_918976.1<br>(E=1.45E-60,<br>Dice=25.0) | PF13550, positional<br>evidence, see text                                      |
| Sano_49 | Salvo_44 | 78.0 | R | 30.4, 30.3 | conserved tail<br>assembly protein | NP_918979.1<br>(E=8.65E-18,<br>Dice=26.0) | IPR018964, PF09356,<br>IPR019228, PF09931,<br>Positional evidence, see<br>text |
| Sano_50 | Salvo_45 | 75.1 | R | 64.0, 63.4 | conserved tail<br>assembly protein | NP_918980.1(E=<br>1.79E-13,<br>Dice=11.5) | Positional evidence, see<br>text                                               |



|         |          |      |   |                 |                                                |                                           |                                                                       |
|---------|----------|------|---|-----------------|------------------------------------------------|-------------------------------------------|-----------------------------------------------------------------------|
| Sano_51 | Salvo_46 | 72.5 | R | 33.2, 33.0      | conserved tail<br>assembly protein             |                                           | Positional evidence, see<br>text                                      |
| Sano_52 | Salvo_47 | 80.8 | R | 36.4, 36.7      | conserved tail<br>assembly protein             |                                           | Positional evidence, see<br>text                                      |
| Sano_53 | Salvo_48 | 77.1 | R | 156.6,<br>156.3 | tape measure protein                           |                                           | IPR013491, TIGR02675                                                  |
| Sano_54 | Salvo_49 | 67.8 | R | 25.6, 25.7      | pre-tape measure<br>frameshift protein G-<br>T | NP_918998.2(E=<br>6.45E-21,<br>Dice=27.0) | Positional evidence, see<br>text                                      |
| Sano_55 | Salvo_50 | 63.2 | R | 18.6, 18.1      | pre-tape measure<br>frameshift protein G       | NP_918998.2(E=<br>4.52E-04,<br>Dice=16.1) | Positional evidence, see<br>text, slippery sequence 5'-<br>GGGAAAC-3' |
| Sano_56 | Salvo_51 | 79.2 | R | 28.4, 28.7      | conserved virion<br>associated protein         | NP_918986.1(E=<br>8.77E-63,<br>Dice=42.6) |                                                                       |
| Sano_57 | Salvo_52 | 78.9 | R | 19.2, 18.8      | conserved virion                               | NP_918987.2(E=                            |                                                                       |

|         |          |      |   |            |                      |                                            |                    |
|---------|----------|------|---|------------|----------------------|--------------------------------------------|--------------------|
|         |          |      |   |            | associated protein   | 8.60E-22,<br>Dice=30.6)                    |                    |
| Sano_58 | Salvo_53 | 79.3 | R | 22.5, 22.8 | conserved protein    | NP_918988.2(E=<br>7.56E-32,<br>Dice=38.9)  |                    |
| Sano_59 | Salvo_54 | 61.7 | R | 13.0, 12.6 | conserved protein    | NP_918989.2(E=<br>2.26E-20,<br>Dice=32.3)  |                    |
| Sano_60 | Salvo_55 | 55.7 | R | 10.4, 9.8  | conserved protein    |                                            |                    |
| Sano_61 | Salvo_56 | 90.3 | R | 38.3, 38.5 | major capsid protein | NP_918991.1(E=<br>1.81E-86,<br>Dice=42.0)  | IPR005564, PF03864 |
| Sano_62 | Salvo_57 | 75.4 | R | 14.2, 13.8 | decorator protein    | NP_918992.1(E=<br>1.72E-14, Dice=<br>28.9) | IPR004195, PF02924 |
| Sano_63 | Salvo_58 | 66.7 | R | 14.6, 15.0 | scaffold             | NP_918993.2(E=                             |                    |

|         |          |      |   |            |                                 |                                            |                                            |
|---------|----------|------|---|------------|---------------------------------|--------------------------------------------|--------------------------------------------|
|         |          |      |   |            |                                 | 4.01E-15,<br>Dice=32.3)                    |                                            |
| Sano_64 | Salvo_59 | 75.2 | R | 47.8, 47.9 | prohead protease                | NP_918994.2(E=<br>1.36E-90,<br>Dice=38.2)  | IPR002142, PF01343,<br>PTHR32497, SSF52096 |
| Sano_65 | Salvo_60 | 83.6 | R | 62.1, 61.6 | portal protein                  | NP_918995.1(E=<br>3.37E-168,<br>Dice=45.7) | IPR006429, PF05136,<br>TIGR01539           |
| Sano_66 | Salvo_61 | 78.1 | R | 8.0, 8.1   | head-to-tail joining<br>protein | NP_918996.1(E=<br>2.70E-12,<br>Dice=29.1)  | IPR004174, PF02831,<br>SSF64210            |
| Sano_67 | Salvo_62 | 83.6 | R | 80.4, 79.2 | terminase large<br>subunit      | NP_918997.2(E=<br>0, Dice=48.3)            | IPR008866, PF05876                         |
| Sano_68 | Salvo_63 | 82.0 | R | 22.0, 22.4 | terminase small<br>subunit      | NP_918999.1(E=<br>4.62E-43,<br>Dice=30.4)  | IPR009901, PF07278                         |

|         |          |      |   |            |                             |                                     |                                                  |
|---------|----------|------|---|------------|-----------------------------|-------------------------------------|--------------------------------------------------|
| Sano_69 | Salvo_64 | 78.3 | R | 54.2, 53.9 | helicase                    | NP_919000.2(E=9.34E-66, Dice=29.3)  | IPR000330, PF00176, IPR014001, SM00487, SSF52540 |
| Sano_70 | Salvo_65 | 77.2 | R | 11.7, 13.7 | Holliday-junction resolvase | NP_919001.2(E=3.75E-18, Dice=30.8)  | IPR014883, PF08774, SM00990                      |
| Sano_71 | Salvo_66 | 78.6 | R | 79.1, 77.8 | DNA polymerase I            | NP_919002.1(E=6.40E-167, Dice=40.2) | IPR001098, PF00476, SM00482, SSF56672            |
| Sano_72 | Salvo_67 | 44.0 | R | 31.1, 30.3 | ligase                      | NP_919004.1(E=4.38E-25, Dice=25.4)  | IPR012340, SSF50249, IPR022595, PF10991          |
| Sano_73 | Salvo_68 | 73.7 | R | 46.6, 44.9 | conserved protein           | NP_919005.2(E=7.93E-59, Dice=27.9)  | IPR021229, PF10926                               |
| Sano_74 | Salvo_69 | 53.8 | R | 16.7, 16.5 | putative lipoprotein        |                                     | LipoP                                            |

|         |          |      |   |            |                      |                |                     |
|---------|----------|------|---|------------|----------------------|----------------|---------------------|
| Sano_75 | Salvo_70 | 86.0 | F | 10.3, 12.2 | hypothetical protein |                |                     |
| Sano_76 | Salvo_71 | 80.5 | F | 95.5, 95.5 | DNA primase          | NP_919008.2(E= | IPR014819, PF08707, |
|         |          |      |   |            |                      | 1.27E-158,     | IPR015330, PF09250, |
|         |          |      |   |            |                      | Dice=33.0)     | SM00943, SSF52540,  |
|         |          |      |   |            |                      |                | SSF56747            |
| Sano_77 | Salvo_72 | 52.6 | F | 10.5, 11.6 | hypothetical protein |                |                     |

---

<sup>a</sup> Putative assignable functions and protein molecular masses are shown.

<sup>b</sup> Protein identities between Sano and Salvo homologs were calculated by the Dice method using BLASTp alignment identity scores.

<sup>c</sup> F/R, coding region on forward or reverse strand, respectively.

<sup>d</sup> E value and Dice identity reported for phage BcepNazgul homologs in Sano.

<sup>e</sup> Evidence includes detected conserved domains or motifs, HHpred hits, or other evidence as detailed in text.

**TABLE S3** Comparative annotations of *Xylella* phages Prado and Paz<sup>a</sup>

| Gene(s)  |        | % protein identity <sup>b</sup> | Strand <sup>c</sup> | Size (kDa) | Putative function    | Phage Cd1 homolog locus tag <sup>d</sup> | Evidence <sup>e</sup> |
|----------|--------|---------------------------------|---------------------|------------|----------------------|------------------------------------------|-----------------------|
| Prado_01 | Paz_01 | 26.9                            | F                   | 9.2, 10.3  | hypothetical protein |                                          |                       |
| Prado_02 | Paz_02 | 20.6                            | F                   | 20.9, 19.6 | conserved protein    | ADD21636.1(E=8E-10, Dice=25.4)           |                       |
| Prado_03 | Paz_03 | 21.4                            | F                   | 18.1, 16.8 | conserved protein    |                                          |                       |
| Prado_04 |        |                                 | F                   | 32.9       | conserved protein    |                                          |                       |
|          | Paz_04 |                                 | F                   | 6.6        | hypothetical protein |                                          |                       |
| Prado_05 | Paz_05 |                                 | F                   | 5.0, 22.2  | hypothetical protein |                                          |                       |
| Prado_06 | Paz_06 |                                 | F                   | 8.2, 13.9  | hypothetical protein |                                          |                       |
| Prado_07 | Paz_07 |                                 | F                   | 19.5, 21.2 | hypothetical protein |                                          |                       |
| Prado_08 | Paz_08 |                                 | F                   | 11.3, 10.8 | hypothetical protein |                                          |                       |
| Prado_09 |        |                                 | F                   | 13.5       | hypothetical protein |                                          |                       |
| Prado_10 | Paz_09 | 24.7                            | F                   | 12.3, 15.8 | hypothetical protein |                                          |                       |
| Prado_11 | Paz_10 | 29.0                            | F                   | 15, 15.8   | conserved protein    | ADD21644.1(E=5.10)                       |                       |



SSF56672

|           |        |      |   |            |                             |                                       |                                                  |
|-----------|--------|------|---|------------|-----------------------------|---------------------------------------|--------------------------------------------------|
| Prado_18  | Paz_18 | 40.1 | F | 32.1, 31.7 | conserved protein           | ADD21654.1(E=5.07<br>E-54, Dice=35.3) |                                                  |
| Prado_19  | Paz_19 | 52.1 | F | 34.4, 35.1 | 5'-3' exonuclease           | ADD21655.1(E=2.63<br>E-72, Dice=38.5) | IPR020045,SSF4780<br>7                           |
| Prado_20, | Paz_20 | 70.2 | F | 14.1, 12.8 | DNA endonuclease VII        | ADD21656.1(E=6.39<br>E-34, Dice=45.9) | IPR004211,<br>PF02945, SSF54060                  |
| Prado_21  | Paz_21 | 79.2 | F | 31.8, 32.2 | 3' to 5' exonuclease        |                                       | IPR012337,<br>SSF53098                           |
| Prado_22  | Paz_22 | 30.3 | F | 22.1, 23.7 | conserved protein           |                                       |                                                  |
| Prado_23  | Paz_24 | 75.2 | F | 8, 8.1     | conserved protein           |                                       |                                                  |
| Prado_24  |        |      | F | 8.2        | hypothetical protein        |                                       |                                                  |
| Prado_25  | Paz_23 | 20.3 | F | 11.4, 9.3  | conserved protein           |                                       |                                                  |
| Prado_26  | Paz_25 | 35.0 | F | 33.3, 37.6 | ATP-dependent DNA<br>ligase | ADD21659.1(E=2.41<br>E-47, Dice=36.3) | (IPR012310,<br>PF01068 Prado only)<br>IPR012340, |



|          |        |      |   |            |                                                   |                                        |                                               |
|----------|--------|------|---|------------|---------------------------------------------------|----------------------------------------|-----------------------------------------------|
|          |        |      |   |            |                                                   |                                        | SSF50249,<br>SSF56091                         |
| Prado_27 | Paz_26 | 43.9 | F | 6.7, 6.4   | hypothetical protein                              |                                        |                                               |
| Prado_28 | Paz_27 | 56.3 | F | 95.6, 91.7 | DNA-dependent<br>single-subunit RNA<br>polymerase | ADD21661.1(E=0,<br>Dice=51.0)          | IPR002092,<br>PTHR10102,<br>PF00940, SSF56672 |
| Prado_29 | Paz_28 | 26.8 | F | 7.1, 6.5   | conserved protein                                 | ADD21662.1(E=2.80<br>E-06, Dice=23.6)  |                                               |
| Prado_30 |        |      | F | 15.2       | conserved protein                                 | ADD21663.1(E=2.42<br>E-16, Dice=24.5)  |                                               |
| Prado_31 | Paz_29 | 30.1 | F | 12.1, 11.3 | conserved protein                                 | ADD21664.1(E=3.00<br>E-05, Dice=31.1)  |                                               |
| Prado_32 | Paz_30 | 47.2 | F | 56.5, 56.5 | head-tail connector                               | ADD21666.1(E=2.43<br>E-154, Dice=44.5) | IPR020991,<br>PF12236                         |
| Prado_33 | Paz_31 | 22.2 | F | 28.9, 26.3 | scaffold                                          | ADD21667.1(E=4.29<br>E-06, Dice=18.5)  | (PHA01929 Prado<br>only)                      |

|          |        |      |   |                 |                                                              |                                        |                        |
|----------|--------|------|---|-----------------|--------------------------------------------------------------|----------------------------------------|------------------------|
| Prado_34 | Paz_32 | 57.1 | F | 36.3, 36.3      | major capsid protein                                         | ADD21668.1(E=2.91<br>E-84, Dice=43.2)  | c118086                |
| Prado_35 | Paz_33 | 19.4 | F | 7.4, 7.9        | hypothetical protein                                         |                                        |                        |
| Prado_36 | Paz_34 | 33.6 | F | 23.9, 24.0      | tail tubular protein A                                       | ADD21669.1(E=4.31<br>E-35, Dice=29.3)  | c110205                |
| Prado_37 | Paz_35 | 42.0 | F | 91.5, 93.8      | tail tubular protein B                                       | ADD21670.1(E=0,<br>Dice=36.8)          |                        |
| Prado_38 | Paz_36 | 38.8 | F | 31.4, 30.2      | internal virion protein                                      | ADD21671.1(E=6.34<br>E-21, Dice=21.7)  |                        |
| Prado_39 | Paz_37 | 28.0 | F | 85.0, 85.1      | internal virion protein                                      | ADD21672.1(E=5.50<br>E-29, Dice=12.0)  |                        |
| Prado_40 | Paz_38 | 34.4 | F | 176.3,<br>147.1 | internal virion protein<br>with transglycosylase<br>activity | ADD21673.1(E=2.85<br>E-120, Dice=18.9) | IPR023346,<br>SSF53955 |
| Prado_41 | Paz_39 | 46.0 | F | 39.8, 39.7      | tail fiber protein                                           | ADD21674.1(E=1.57<br>E-15, Dice=7.6)   | IPR005604,<br>PF03906  |

|          |        |      |   |            |                         |                                       |                                                  |
|----------|--------|------|---|------------|-------------------------|---------------------------------------|--------------------------------------------------|
| Prado_42 | Paz_40 | 32.8 | F | 44, 43.3   | tail fiber protein      |                                       | See text                                         |
| Prado_43 | Paz_41 | 24.5 | F | 33.6, 34.7 | tail fiber protein      |                                       | See text                                         |
| Prado_44 | Paz_42 | 36.2 | F | 21.2, 20.7 | tail fiber protein      |                                       | See text                                         |
| Prado_45 | Paz_43 | 38.2 | F | 7.3, 7.0   | holin                   |                                       | Predicted 2 TMDs,<br>see text                    |
| Prado_46 | Paz_44 | 27.7 | F | 10.1, 10.2 | terminase small subunit | ADD21677.1(E=1.80<br>E-05, Dice=21.9) |                                                  |
| Prado_47 | Paz_45 | 59.8 | F | 65.8, 65.7 | terminase large subunit | ADD21678.1(E=0,<br>Dice=54.9)         |                                                  |
| Prado_48 | Paz_46 | 41.9 | F | 8.5, 7.2   | hypothetical protein    |                                       |                                                  |
|          | Paz_47 |      | F | 29.8       | conserved protein       |                                       |                                                  |
| Prado_49 | Paz_48 | 49.3 | F | 19.2, 18.3 | endolysin               | ADD21680.1(E=1.52<br>E-25, Dice=32.0) | IPR002196,<br>PF00959,<br>IPR023346,<br>SSF53955 |
| Prado_50 | Paz_49 | 17.1 | F | 11.2, 10.8 | i-spanin                |                                       | N-terminal TMD                                   |

|          |        |      |   |            |                   |                                       |                                                                      |
|----------|--------|------|---|------------|-------------------|---------------------------------------|----------------------------------------------------------------------|
| Prado_51 | Paz_50 | 41.9 | F | 10.7, 10.2 | o-spanin          | ADD21682.1(E=1.25<br>E-05, Dice=20.1) | Lipoprotein<br>overlapped with<br>inner membrane<br>spanin component |
| Prado_52 | Paz_51 | 39.7 | F | 15.1, 14.1 | conserved protein |                                       |                                                                      |

---

<sup>a</sup> Putative assignable functions and protein molecular masses are shown.

<sup>b</sup> Protein identities between Prado and Paz homologs were calculated by the Dice method using BLASTp alignment identity scores.

<sup>c</sup> F/R, coding region on forward or reverse strand, respectively.

<sup>d</sup> E value and Dice identity reported for phage Cd1 homologs in Prado.

<sup>e</sup> Evidence includes detected conserved domains or motifs, HHpred hits, or other evidence as detailed in text.
